# Supplementary material for: Low-quality employment trajectories and the risk of common mental health disorders among individuals with Swedish and foreign background – a register-based cohort study
Source: PubMed Central journal article supplement (PMC9527776; doi:10.5271/sjweh.4029), 2022-06-30
Supplement: SJWEH-48-351-S001.pdf [file SJWEH-48-351-S001.pdf]

**Low-quality employment trajectories and the risk of common mental health disorders among individuals with Swedish and foreign background – a register-based cohort study<sup>1</sup>**

1. SUPPLEMENTARY MATERIAL

2. Correspondence to: Roxana Pollack, Unit of Occupational Medicine, The Institute of Environmental Medicine, Karolinska Institutet, Stockholm, Sweden. [E-mail: [roxana.pollack@gmail.com](mailto:roxana.pollack@gmail.com)]

**Table S1.** Description of the grouping of trajectories for the exposure variable ‘employment trajectories’ according to combinations of employment statuses matching different patterns.

| Constant trajectories <sup>b</sup>                  |                                                                                                                  |
|-----------------------------------------------------|------------------------------------------------------------------------------------------------------------------|
| Constant low-quality Employment Trajectories        | Constant UE <sup>a</sup> (0.75%), Constant SSE (39.84%), Constant PER (51.08%), Constant LQ (8.36%)              |
| Constant high-quality Employment Trajectories       | Constant BO (2.44%), Constant HMJH (2.32%), Constant SER (56.16%), Constant SER/HI (31.95%), Constant HQ (7.13%) |
| Fluctuating trajectories <sup>c</sup>               |                                                                                                                  |
| Fluctuating low-quality Employment Trajectories     | Fluctuating LQ and HM (5.59%), Fluctuating LQ and HQ (92.23%), Fluctuating LQ (0.85%)                            |
| Fluctuating high-quality Employment Trajectories    | Fluctuating HQ and HM (31.70%), Fluctuating HQ (68.30%)                                                          |
| Trajectories characterized by mobility <sup>d</sup> |                                                                                                                  |
| Mobility low-quality Employment Trajectories        | Within LQ (0.43%), Between LQ and HMJH (11.78%), Downward HQ to LQ (87.78%)                                      |
| Mobility high-quality Employment Trajectories       | Upward LQ and HQ (74.39%), Within HQ (3.30%), Between HQ and HMJH (22.31%)                                       |

- a. List of abbreviations: UE=unemployment; PER=precarious employment relationship; SSE=solo self-employment; HMJH=hybrid multiple job holding; BO= business owning; SER= standard employment relationship; SER/Hi=standard employment relationship with high income; LQ=low quality; HQ=high quality.
- b. Constant trajectories = Spending 4-5 years in a specific employment status, or in combinations of Low Quality or High-Quality employment statuses, independent of order through time.
- c. Fluctuating trajectories = Spending a minimum of 2 years in two different employment statuses with fluctuating movement in-and-out of the these. Combinations of LQ- and HQ-employment statuses are also included (if a minimum of 2 years in the LQ- and HQ-classes, respectively).
- d. Trajectories characterized by mobility = Spending a minimum of 1 year in one employment status at the beginning of the trajectory, followed by a minimum of 2 years in another employment status at the end of the trajectory. The last 2 years could also be characterized by combinations of LQ- or HQ-employment statuses. Mobility can be upwards, downwards, within or between.

**Table S2.** Fully adjusted Cox regression model for CMD according to employment trajectories and stratified by Swedish-born with Swedish background and foreign background and sex (n=2,703,687).

|                                      | CMD              |                     |                  |                     |
|--------------------------------------|------------------|---------------------|------------------|---------------------|
|                                      | Male             |                     | Female           |                     |
|                                      | aHR <sup>a</sup> | 95% CI <sup>b</sup> | aHR <sup>a</sup> | 95% CI <sup>b</sup> |
| Constant HQ                          | Reference        |                     |                  |                     |
| Swedish-born with Swedish background |                  |                     |                  |                     |
| Constant LQ                          | 1.25             | 1.20-1.29           | 1.30             | 1.25-1.35           |
| Fluctuating HQ                       | 0.97             | 0.92-1.03           | 1.01             | 0.95-1.08           |
| Fluctuating LQ                       | 1.19             | 1.14-1.23           | 1.15             | 1.11-1.19           |

|                           |      |             |      |            |
|---------------------------|------|-------------|------|------------|
| Mobility HQ               | 1.12 | 1.07-1.17   | 1.13 | 1.09-1.17  |
| Mobility LQ               | 1.21 | 1.16– 1.27  | 1.20 | 1.15-1.25  |
| Second-gen migrants       |      |             |      |            |
| Constant HQ               | 1.07 | 1.03-1.12   | 1.13 | 1.09-1.17  |
| Constant LQ               | 1.54 | 1.41-1.68   | 1.58 | 1.47-1.72  |
| Fluctuating HQ            | 1.12 | 0.96-1.30   | 1.23 | 1.05-1.44  |
| Fluctuating LQ            | 1.38 | 1.27-1.51   | 1.44 | 1.33-1.55  |
| Mobility HQ               | 1.22 | 1.09-1.36   | 1.33 | 1.21-1.46  |
| Mobility LQ               | 1.31 | 1.16-1.47   | 1.49 | 1.35-1.65  |
| First-gen EU migrants     |      |             |      |            |
| Constant HQ               | 1.18 | 1.11-1.25   | 1.20 | 1.14- 1.26 |
| Constant LQ               | 1.43 | 1.28-1.61   | 1.56 | 1.40- 1.74 |
| Fluctuating HQ            | 1.12 | 0.92-1.35   | 1.18 | 0.97- 1.44 |
| Fluctuating LQ            | 1.34 | 1.20-1.50   | 1.50 | 1.36- 1.65 |
| Mobility HQ               | 1.35 | 1.18 - 1.56 | 1.24 | 1.10- 1.40 |
| Mobility LQ               | 1.22 | 1.05 - 1.42 | 1.46 | 1.28-1.65  |
| First-gen non-EU migrants |      |             |      |            |
| Constant HQ               | 1.24 | 1.14- 1.34  | 1.41 | 1.33- 1.50 |
| Constant LQ               | 1.39 | 1.21 - 1.58 | 1.66 | 1.46-1.88  |
| Fluctuating HQ            | 1.39 | 1.09 - 1.78 | 1.35 | 1.03-1.76  |
| Fluctuating LQ            | 1.40 | 1.22 - 1.61 | 1.65 | 1.48- 1.85 |
| Mobility HQ               | 1.36 | 1.13 - 1.63 | 1.36 | 1.17-1.58  |
| Mobility LQ               | 1.42 | 1.19 - 1.71 | 1.73 | 1.50-1.99  |

a. HR- adjusted Hazard Ratios

b. CI – Confidence Interval

c. Reference group: Swedish born with Swedish background in *Constant high-quality* employment trajectories (n=2,703,687).

**Table S3.** Adjusted Cox regression model for CMD according to employment trajectories and stratified by background and sex, excluding unemployed individuals in *Constant low-quality* employment trajectories (constant unemployment).

|                                      | CMD              |                     |                  |                     |
|--------------------------------------|------------------|---------------------|------------------|---------------------|
|                                      | Male             |                     | Female           |                     |
|                                      | aHR <sup>a</sup> | 95% CI <sup>b</sup> | aHR <sup>a</sup> | 95% CI <sup>b</sup> |
| Constant HQ                          | Reference        |                     |                  |                     |
| Swedish-born with Swedish background |                  |                     |                  |                     |
| Constant LQ                          | 1.24             | 1.19-1.28           | 1.15             | 1.00-1.32           |

|                           |      |           |      |           |
|---------------------------|------|-----------|------|-----------|
| Second-gen migrants       |      |           |      |           |
| Constant LQ               | 1.41 | 1.28-1.55 | 1.37 | 1.26-1.50 |
| First-gen EU migrants     |      |           |      |           |
| Constant LQ               | 1.21 | 1.07-1.36 | 1.30 | 1.17-1.46 |
| First-gen non-EU migrants |      |           |      |           |
| Constant LQ               | 1.15 | 1.00-1.32 | 1.18 | 1.03-1.35 |

a. HR- adjusted Hazard Ratios

b. CI – Confidence Interval

c. Reference group: *Constant high-quality* employment trajectories in each stratification group (n=2,703,687)

**Table S4.** Estimates for risk of CMD according to employment trajectories and background of origin, including an interaction term between employment trajectories and background of origin.

|                                                           | CMD              |                     |
|-----------------------------------------------------------|------------------|---------------------|
|                                                           | aOR <sup>a</sup> | 95% CI <sup>b</sup> |
| <b>Employment Trajectories</b>                            |                  |                     |
| Trajectories in Constant high-quality                     | Reference        |                     |
| Constant LQ                                               | 1.37             | 1.34-1.41           |
| Fluctuating HQ                                            | 0.95             | 0.91-0.99           |
| Fluctuating LQ                                            | 1.30             | 1.26-1.33           |
| Mobility HQ                                               | 1.24             | 1.21-1.28           |
| Mobility LQ                                               | 1.31             | 1.27-1.36           |
| <b>Background of origin</b>                               |                  |                     |
| <b>Swedish-born with Swedish background</b>               | Reference        |                     |
| Second gen                                                | 1.22             | 1.18-1.25           |
| First-gen EU migrant                                      | 1.41             | 1.37-1.45           |
| First-gen non-EU migrant                                  | 1.76             | 1.69-1.83           |
| <b>Background of origin &amp; Employment trajectories</b> |                  |                     |
| Swedish-born with Swedish background in Constant HQ       | Reference        |                     |
| Second-gen migrants                                       |                  |                     |
| Constant LQ                                               | 1.14             | 1.07-1.22           |
| Fluctuating HQ                                            | 1.07             | 0.95-1.21           |
| Fluctuating LQ                                            | 1.08             | 1.01-1.16           |
| Mobility HQ                                               | 1.03             | 0.95-1.12           |
| Mobility LQ                                               | 1.06             | 0.97 –<br>1.15      |

|                           |      |           |
|---------------------------|------|-----------|
| First-gen EU migrants     |      |           |
| Constant LQ               | 0.94 | 0.86-1.02 |
| Fluctuating HQ            | 0.97 | 0.84-1.21 |
| Fluctuating LQ            | 0.96 | 0.89-1.04 |
| Mobility HQ               | 0.93 | 0.84-1.03 |
| Mobility LQ               | 0.89 | 0.80-1.99 |
| First-gen non-EU migrants |      |           |
| Constant LQ               | 0.82 | 0.74-0.90 |
| Fluctuating HQ            | 1.02 | 0.84-1.23 |
| Fluctuating LQ            | 0.93 | 0.84-1.02 |
| Mobility HQ               | 0.86 | 0.76-0.98 |
| Mobility LQ               | 0.96 | 0.85-1.08 |

a. OR- unadjusted Odds Ratios

b. CI – Confidence Interval

**Table S5.** Adjusted Cox regression model for CMD according to employment trajectories and stratified by sex among First generation non-EU migrants excluding individuals from former Soviet Union countries. Reference group: *Constant high-quality* employment trajectories (n=2,703,687).

|                       | CMD              |                     |                  |                     |
|-----------------------|------------------|---------------------|------------------|---------------------|
|                       | Male             |                     | Female           |                     |
|                       | aHR <sup>a</sup> | 95% CI <sup>b</sup> | aHR <sup>a</sup> | 95% CI <sup>b</sup> |
| Constant HQ           | Reference        |                     |                  |                     |
| First-gen EU migrants |                  |                     |                  |                     |
| Constant LQ           | 1.15             | 01.00-1.32          | 1.20             | 1.05-1.37           |
| Fluctuating HQ        | 1.10             | 0.87-1.43           | 0.96             | 0.73-1.26           |
| Fluctuating LQ        | 1.14             | 0.98-1.32           | 1.21             | 1.07-1.37           |
| Mobility HQ           | 1.11             | 0.92-1.34           | 0.98             | 0.83-1.14           |
| Mobility LQ           | 1.15             | 0.95-1.40           | 0.98             | 1.08-1.45           |

a. HR- adjusted Hazard Ratios

b. CI – Confidence Interval

c. Reference group: *Constant high-quality* employment trajectories in each stratification group (n=2,703,687)

**Table S6.** Adjusted Cox regression model for CMD according to employment trajectories and stratified by background and sex, including time since migration.

|                           | CMD              |                     |                  |                     |
|---------------------------|------------------|---------------------|------------------|---------------------|
|                           | Male             |                     | Female           |                     |
|                           | aHR <sup>a</sup> | 95% CI <sup>b</sup> | aHR <sup>a</sup> | 95% CI <sup>b</sup> |
| Constant HQ               | Reference        |                     |                  |                     |
| First-gen EU migrants     |                  |                     |                  |                     |
| Constant LQ               | 1.21             | 1.08-1.36           | 1.30             | 1.17-1.45           |
| Fluctuating HQ            | 0.93             | 0.99-1.13           | 1.01             | 0.83-1.23           |
| Fluctuating LQ            | 1.11             | 0.98-1.25           | 1.23             | 1.11-1.35           |
| Mobility HQ               | 1.13             | 1.98-1.30           | 1.01             | 0.90-1.15           |
| Mobility LQ               | 1.02             | 0.87 – 1.19         | 1.20             | 1.05-1.36           |
| First-gen non-EU migrants |                  |                     |                  |                     |
| Constant LQ               | 1.13             | 0.98-1.30           | 1.19             | 1.04-1.36           |
| Fluctuating HQ            | 1.12             | 0.87-1.44           | 0.95             | 0.73-1.25           |
| Fluctuating LQ            | 1.14             | 0.98-1.32           | 1.19             | 1.06-1.34           |
| Mobility HQ               | 1.09             | 0.90-1.32           | 0.97             | 1.83-1.13           |
| Mobility LQ               | 1.15             | 0.95-1.39           | 1.24             | 1.07-1.44           |

a. HR- adjusted Hazard Ratios

b. CI – Confidence Interval

c. Reference group: *Constant high-quality* employment trajectories in each stratification group (n=2,703,687).

**Figure S1.** Flow chart illustrating the study population (2,703,687) after the application of inclusion and exclusion criteria

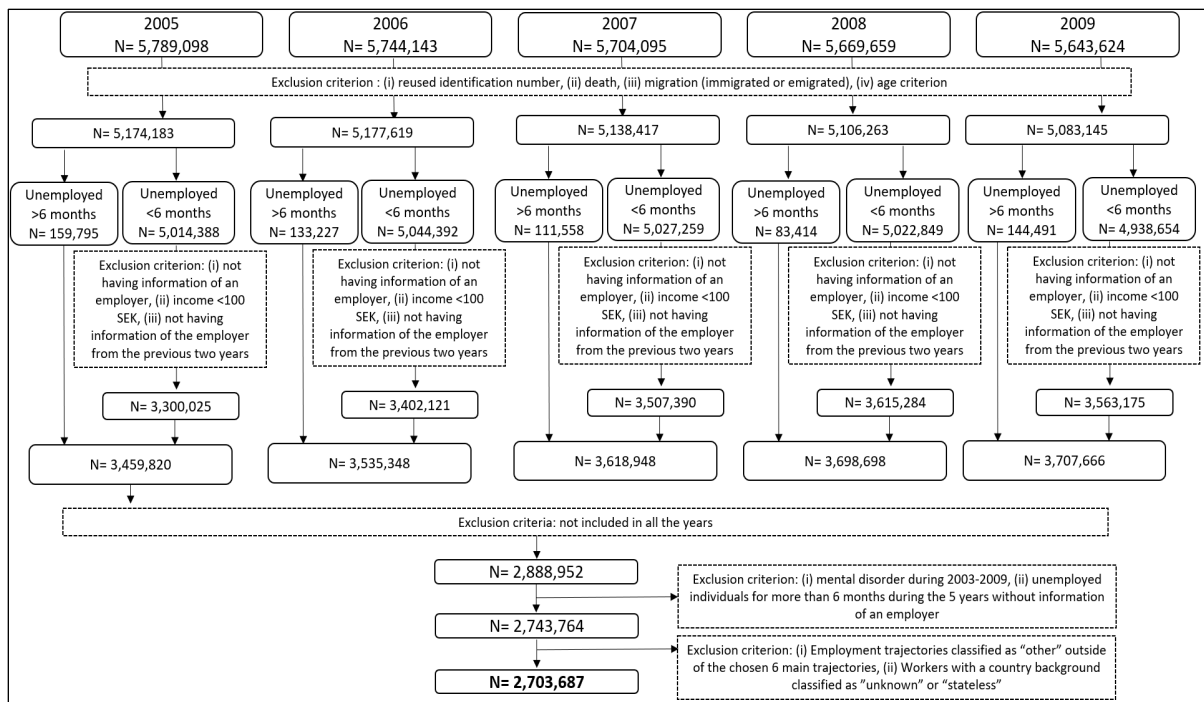

**Figure S2.** Direct Acyclic Graph (DAG) for the effect of employment trajectories on severe Common mental disorders.

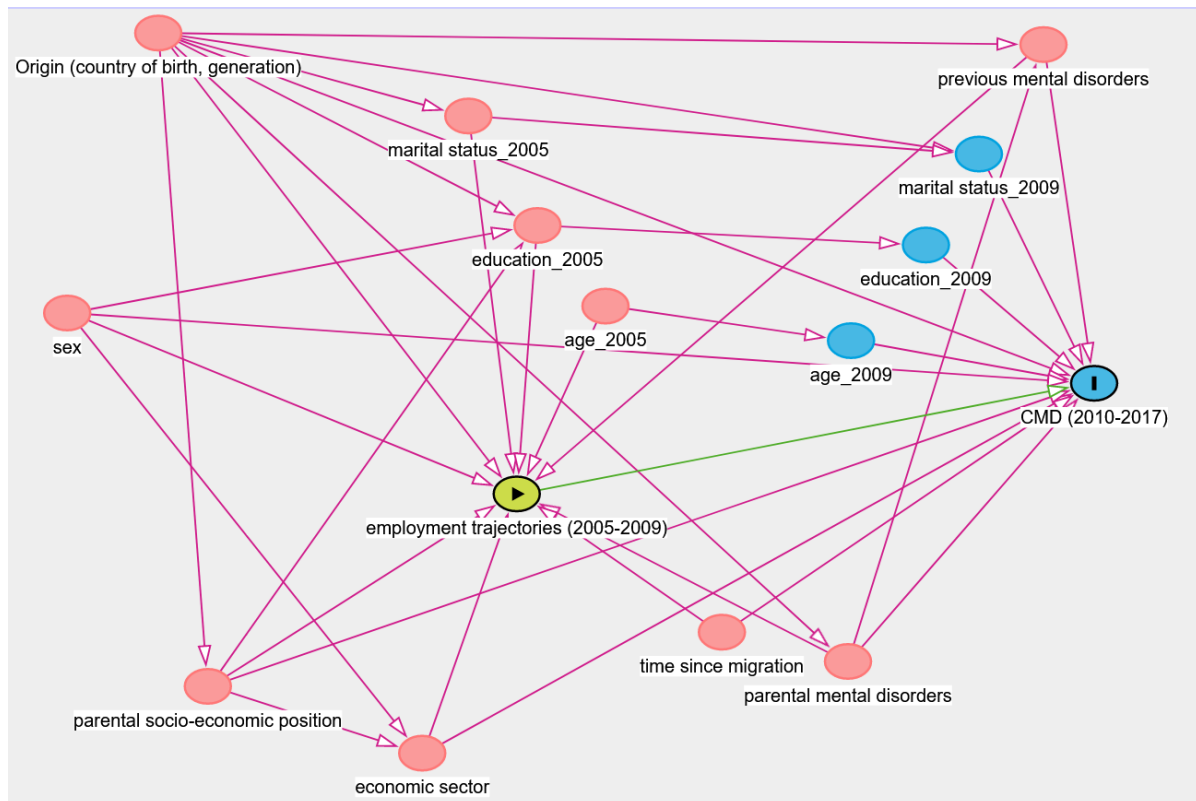

- a. Note: The minimal sufficient adjustment sets for estimating the total effect of employment trajectories (2005-2009) on CMD (2010-2017) includes the following variables: Origin (country of birth, generation), age\_2005, economic sector, education\_2005, marital status\_2005, parental mental disorders, parental socio-economic position, previous mental disorders, sex, and time since migration.
